# Supplementary material for: Identification of biomarkers and immune infiltration characterization of lipid metabolism associated genes in osteoarthritis based on machine learning algorithms
Source: publisher site journal article supplement (doi:10.18632/aging.205740), 2024-04-17
Supplement: Supplementary file [file aging-v16i8-205740-supplementary-material-SD2.pdf]

## SUPPLEMENTARY TABLE

Supplementary Table 2. The primers used for qPCR detection.

| Gene name | Primer sequences (5'–3')                |
|-----------|-----------------------------------------|
| GAPDH     | Forward (F) 5'-ATGCCGCCTGGAGAAACC-3'    |
|           | Reverse (R) 5'-GCATCAAAGGTGGAAGAATGG-3' |
| JUN       | Forward (F) 5'-CAGCCAGGTCGGCAGTATAG-3'  |
|           | Reverse (R) 5'-GGACTCTGCCACTTGTCTCC-3'  |
| LTC4S     | Forward (F) 5'-CCGACGGTACCATGAAGGAC-3'  |
|           | Reverse (R) 5'-GCAGGGAGAAGTAGGCTTGC-3'  |
| NFKBIA    | Forward (F) 5'-ATGTCAATGCTCAGGAGCCC-3'  |
|           | Reverse (R) 5'-GGTCAGTCACTCGAAGCACA-3'  |
