# Supplementary material for: Identification of biomarkers and immune infiltration characterization of lipid metabolism-associated genes in osteoarthritis based on machine learning algorithms
Source: Aging (Albany NY). 2024 Apr 17;16(8):7043–59. doi: 10.18632/aging.205740 (PMC11087088; doi:10.18632/aging.205740)
Supplement: Supplementary Table 1 [file aging-16-205740-s001.xlsx]

## Sheet: Sheet1
Supplementary Table 1. Identification of lipid metabolism-associated genes.
APOB
APOA4
APOA1
LDLR
OLR1
ARHGEF1
MMP1
RHOA
ROCK2
NOS3
PIK3CA
PIK3CD
PIK3CB
PIK3R1
PIK3R2
PIK3R3
AKT1
AKT2
AKT3
BAX
BAD
BCL2L1
BCL2
MAPK8
MAPK10
MAPK9
SOD2
PRKCA
POU2F1
POU2F2
POU2F3
CD40
CD40LG
CYP1A1
CYP2A7
CYP2B6
CYP2C8
CYP2C9
CYP2J2
AGER
NOX1
CYBB
NCF1
CYBA
NCF2
NCF4
RAC1
SRC
JAK2
STAT3
CDC42
MAP2K4
MAP2K7
FOS
JUN
CCL2
ICAM1
MAP2K3
MAP2K6
MAPK11
MAPK12
MAPK13
MAPK14
HRAS
KRAS
NRAS
MAPK1
MAPK3
RELA
NFKB1
SELE
SELP
VCAM1
MMP3
MMP9
FAS
IL1B
IL6
TNF
HSPD1
HSPA8
HSPA1A
HSPA2
HSPA1L
HSPA1B
HSPA6
HSPA4
HSP90AA1
HSP90AB1
HSP90B1
TLR2
LBP
CD14
LY96
TLR4
TIRAP
MYD88
IRAK4
IRAK1
TRAF6
TAB1
TAB2
MAP3K7
CHUK
IKBKB
IKBKG
NFKBIA
TICAM1
TRAF3
MIB1
MIB2
TANK
IKBKE
TBK1
IRF7
IRF3
IFNA2
IFNA4
IFNA6
IFNA7
IFNA8
IFNA10
IFNA14
IFNA16
IFNA21
IFNB1
CD36
PPARG
RXRA
RXRB
RXRG
LYN
PTK2
VAV3
VAV1
VAV2
TLR6
RAP1A
RAP1B
CCL5
CCL3
CCL3L3
CXCL1
CXCL2
CXCL3
IL12A
IL12B
NLRP3
IL18
HSPA5
ATF6
DDIT3
ITPR1
CAMK2A
CAMK2D
CAMK2B
CAMK2G
EIF2AK3
EIF2S1
ATF4
ERN1
TRAF2
MAP3K5
XBP1
ABCA1
ABCG1
NFE2L2
PYCARD
CASP1
VLDLR
PDPK1
GSK3B
NFATC1
NFATC2
NFATC3
PLCB1
PLCB2
PLCB3
PLCB4
PLCG1
CALML3
CALM2
CALM3
CALM1
CALML6
CALML5
CALML4
PPP3CA
PPP3CB
PPP3CC
PPP3R1
PPP3R2
TNFSF10
TNFRSF10A
TNFRSF10B
TNFRSF1A
FASLG
CASP8
BID
CYCS
APAF1
CASP9
CASP6
CASP3
CASP7
TP53
SPTLC1
SPTLC2
SPTLC3
CERS1
CERS2
CERS4
CERS3
CERS6
CERS5
DEGS1
DEGS2
SMPD1
SGMS1
SGMS2
NSMAF
SMPD2
ASAH1
ASAH2
ACER2
ACER1
TRADD
CTSD
PRKCZ
PPP2CA
PPP2CB
PPP2R1B
PPP2R1A
PPP2R2A
PPP2R2B
PPP2R2C
PPP2R2D
PPP2R3B
PPP2R3C
PPP2R3A
PPP2R5B
PPP2R5C
PPP2R5D
PPP2R5E
PPP2R5A
FCER1A
MS4A2
FCER1G
FYN
GAB2
PLD1
PLD2
SPHK1
SPHK2
KNG1
ADORA1
ADORA3
BDKRB2
OPRD1
GNAI1
GNAI3
GNAI2
PRKCE
SGPP1
SGPP2
ABCC1
SGPL1
S1PR1
S1PR2
RAF1
MAP2K1
MAP2K2
RAC2
RAC3
S1PR3
GNAQ
PRKCB
PRKCG
S1PR4
S1PR5
GNA12
GNA13
ROCK1
PTEN
B3GNT5
B3GALT1
B3GALT2
B3GALT5
FUT1
FUT2
FUT3
ST3GAL3
ST3GAL4
ABO
B4GALT1
B4GALT2
B4GALT3
B4GALT4
FUT9
FUT4
FUT5
FUT6
FUT7
ST3GAL6
ST8SIA1
A4GALT
B3GALNT1
B3GNT2
B3GNT3
B3GNT4
GCNT2
KDSR
ACER3
SMPD3
SMPD4
ENPP7
CERK
UGCG
GBA
GBA2
B4GALT6
GLB1
UGT8
GALC
GAL3ST1
ARSA
NEU1
NEU3
NEU4
NEU2
GLA
PSAP
PSAPL1
GLYCTK
ALDH2
ALDH3A2
ALDH1B1
ALDH7A1
ALDH9A1
AKR1B1
AKR1B10
AKR1A1
GK2
GK
GPAM
GPAT2
AGPAT1
AGPAT2
AGPAT3
AGPAT4
AGPAT5
LCLAT1
MBOAT1
MBOAT2
LPIN1
LPIN3
LPIN2
DGKZ
DGKD
DGKI
DGKA
DGKE
DGKB
DGKH
DGKG
DGKQ
DGKK
DGAT1
DGAT2
MOGAT3
CEL
PNPLA2
PNPLA3
PNLIP
PNLIPRP1
PNLIPRP2
PNLIPRP3
LIPC
LIPF
LIPG
LPL
AGK
MGLL
MOGAT1
MOGAT2
GPD1L
GPD1
GPD2
GNPAT
CHPT1
CEPT1
PLD3
PLD4
LCAT
PLA2G10
PLA2G2D
PLA2G2E
PLA2G3
PLA2G2F
PLA2G12A
PLA2G12B
PLA2G1B
PLA2G5
PLA2G2A
PLA2G2C
PLA2G4E
PLA2G4A
JMJD7-PLA2G4B
PLA2G4C
PLA2G4D
PLA2G4F
PLA2G6
PLB1
LPCAT2
LPCAT1
LPCAT4
LPCAT3
LYPLA1
PLA2G15
LYPLA2
PNPLA6
PNPLA7
GPCPD1
CHAT
ACHE
CHKA
CHKB
PHOSPHO1
PCYT1B
PCYT1A
ETNK1
ETNK2
PCYT2
PEMT
CDS1
CDS2
PLA1A
PTDSS1
PTDSS2
PISD
PGS1
CRLS1
LPGAT1
CDIPT
MBOAT7
AGPS
ENPP6
ENPP2
GDPD3
GDPD1
TMEM86B
PAFAH1B1
PAFAH1B2
PAFAH1B3
PLA2G7
PAFAH2
GBGT1
HEXA
HEXB
NAGA
ST3GAL1
ST3GAL2
B4GALNT1
B3GALT4
ST8SIA5
ST3GAL5
SLC33A1
ST6GALNAC3
ST6GALNAC4
ST6GALNAC5
ST6GALNAC6
SIN3B
NCOR1
NCOR2
HDAC3
SIN3A
TBL1X
PPARA
TBL1XR1
CHD9
NCOA1
TGS1
CREBBP
NCOA2
NCOA6
SMARCD3
CARM1
MED1
FABP1
ALAS1
ESRRA
NRF1
PPARGC1B
FDFT1
NFYA
NFYB
NFYC
SP1
SREBF1
SREBF2
HMGCS1
ACADM
FHL2
CYP7A1
NR1H4
ACOX1
GRHL1
SLC27A1
CPT1A
RORA
EP300
PEX11A
TXNRD1
CYP4A11
FADS1
ME1
CLOCK
NPAS2
ARNTL
G0S2
APOA5
HMGCS2
ABCB4
NR1H3
NR1H2
GPS2
AHR
ARNT
ARNT2
AHRR
TRIB3
TIAM2
TNFRSF21
NR1D1
PLIN2
CPT2
GLIPR1
SULT2A1
ANGPTL4
PPARGC1A
MED11
CCNC
MED6
MED16
MED9
MED7
MED31
MED20
MED27
MED18
MED15
MED14
CDK8
MED19
MED29
MED23
MED22
MED13
MED28
CDK19
MED26
MED24
MED21
MED30
MED17
MED4
MED12
MED13L
MED8
MED10
MED25
THRAP3
NCOA3
FAM120B
AGT
RGL1
APOA2
ANKRD1
ACSL1
HMGCR
MTF1
CIDEC
CIDEA
FITM1
FITM2
HILPDA
HSD17B13
AGMO
LIPE
PNPLA4
PLIN3
FABP4
PLIN1
ABHD5
PPP1CC
PPP1CA
PPP1CB
PNPLA5
PRKACA
PRKACB
PRKACG
CAV1
FABP9
FABP7
FABP2
FABP6
FABP3
FABP12
FABP5
PNPLA8
ABHD4
PLBD1
PLA2R1
STARD7
BCHE
MFSD2A
ABHD3
STARD10
PCTP
CSNK2A1
CSNK2A2
CSNK2B
SLC44A2
SLC44A4
SLC44A3
SLC44A5
SLC44A1
OSBPL5
OSBPL8
OSBPL10
ALPI
PLD6
ACP6
LIPI
LIPH
DDHD1
DDHD2
PITPNB
PITPNM3
PITPNM1
PITPNM2
DGAT2L6
AWAT2
HADHA
HADHB
TAZ
PTPMT1
CPNE1
CPNE3
CPNE6
CPNE7
MTMR10
MTMR2
MTMR12
MTMR4
MTM1
PIKFYVE
FIG4
VAC14
INPP5F
PIK3C2A
PIK3C3
PIK3R4
INPP4A
INPP4B
PI4K2A
PI4K2B
MTMR9
MTMR7
PI4KA
ARF3
ARF1
PI4KB
PIK3C2G
TPTE
TPTE2
INPP5E
OCRL
SACM1L
PIP4K2B
PIP4K2C
PIP4K2A
SBF2
PIP5K1B
PIP5K1A
PTPN13
PLEKHA1
PLEKHA2
MTMR6
INPP5K
INPP5J
INPP5D
INPPL1
MTMR14
SYNJ1
MTMR3
SYNJ2
MTMR1
PIP5K1C
PLEKHA3
PLEKHA8
PLEKHA5
PLEKHA6
PLEKHA4
RUFY1
PIK3R5
PIK3CG
PIK3R6
PIK3C2B
MTMR8
BMX
RAB4A
RAB14
RAB5A
GDPD5
GDE1
SBF1
TNFAIP8L1
TNFAIP8
TNFAIP8L2
TNFAIP8L3
FASN
PPT1
OLAH
ACSF3
SLC27A3
ACSBG2
ACSBG1
ACSL3
ACSL4
ELOVL6
ELOVL3
ELOVL7
ELOVL1
ELOVL4
TECRL
TECR
ACSL5
ACSL6
ELOVL2
ELOVL5
HSD17B3
HSD17B12
SLC25A1
ACACA
PPT2
ACLY
MORC2
CBR4
HSD17B8
SCD
SCD5
PON2
PON3
PON1
ALOX5AP
ALOX5
LTC4S
GPX2
GPX4
GPX1
CYP1A2
CYP1B1
CYP2U1
CYP4F2
CYP2C19
FAAH2
CYP4A22
CYP4F22
CYP4B1
CYP4F11
CYP4F8
CYP4F3
ALOX15
DPEP3
DPEP2
DPEP1
GGT5
GGT1
LTA4H
MAPKAPK2
PTGR1
ALOX12
PTGR2
PTGS2
PTGDS
AKR1C3
TBXAS1
HPGD
PTGES
PTGS1
CBR1
CYP8B1
PTGIS
PTGES3
PTGES2
HPGDS
EPHX2
ALOX15B
FAAH
ALOXE3
ALOX12B
AWAT1
ACBD4
ACBD5
ECI2
EHHADH
DECR2
HSD17B4
MLYCD
ABCD1
ACOT4
ACOT8
ACOT6
ACAA1
HAO2
SLC25A17
PHYH
SLC27A2
PECR
HACL1
ACOX2
ACOXL
SCP2
ACOX3
CRAT
AMACR
CROT
NUDT7
NUDT19
FADS2
ACBD7
DBI
ACSF2
ACAD11
MCAT
NDUFAB1
ACOT9
THEM5
THEM4
MECR
ECHS1
HADH
ACADL
ACADS
ACADVL
ACSM3
ECI1
DECR1
MMAA
PCCA
PCCB
MCEE
ACAD10
ACOT7
ACOT11
ACOT12
ACOT13
ACOT1
ACBD6
ACAA2
SLC22A5
PRKAA2
PRKAG2
PRKAB2
ACACB
CPT1B
PPARD
MID1IP1
THRSP
SLC25A20
GC
CUBN
VDR
CYP24A1
LGMN
CYP27B1
CYP2R1
PIAS4
UBE2I
SUMO2
LRP2
SERPINA6
HSD11B2
HSD11B1
HSD3B2
HSD3B1
CYP17A1
CYP21A2
CYP11B2
CYP11B1
POMC
SRD5A2
SRD5A3
CGA
LHB
SRD5A1
AKR1B15
CYP19A1
HSD17B1
HSD17B14
HSD17B11
HSD17B2
TSPO
STAR
FDX1
CYP11A1
FDXR
STARD4
STARD6
STARD3
STARD3NL
SLCO1A2
ALB
ABCB11
SLCO1B1
SLC27A5
BAAT
SLC10A2
ABCC3
SLC10A1
SLCO1B3
STARD5
CYP7B1
OSBPL2
OSBPL6
OSBPL3
OSBPL9
OSBPL7
OSBPL1A
OSBP
CYP27A1
AKR1C1
AKR1C4
AKR1D1
HSD3B7
CYP46A1
CYP39A1
CH25H
PMVK
CYP51A1
MVD
ARV1
DHCR7
EBP
DHCR24
LBR
MSMO1
GGPS1
NSDHL
FDPS
MVK
IDI2
IDI1
ACAT2
HSD17B7
TM7SF2
LSS
SQLE
KPNB1
MBTPS2
SCAP
SAR1B
SEC24C
SEC24D
SEC24A
SEC24B
SEC23A
INSIG2
INSIG1
MBTPS1
RAN
OXCT1
OXCT2
BDH1
ACAT1
HMGCLL1
HMGCL
AACS
ACSS3
BDH2
VAPB
VAPA
PPM1L
ALDH3B2
SAMD8
SPTSSB
SPTSSA
ORMDL2
ORMDL3
ORMDL1
FA2H
CSNK1G2
ALDH3B1
PRKD1
PRKD3
PRKD2
SPNS2
ESYT2
ESYT3
ESYT1
GLTP
GLB1L
STS
SUMF1
SUMF2
GM2A
CTSA
ARSG
ARSJ
ARSB
ARSD
ARSF
ARSH
ARSK
ARSI
GBA3
GSTM4
CYP2E1
CYP2D6
CYP3A4
DHRS7B
FAR2
FAR1
